# Supplementary material
Source: publisher figshare collection journal article supplement (https://asha.figshare.com/articles/dataset/_/25892923)
Supplement: Supplementary file 1 [file 2]

**Supplemental Material S1.** Characteristics of PwPD included in the meta-analysis.

| Acoustic Feature      | Article                    | Language   | Disease<br>duration | Age   | n PD | F  | M  |
|-----------------------|----------------------------|------------|---------------------|-------|------|----|----|
| F0 variability        | Bandini et al. (2015)      | Italian    | 8.3                 | 72.2  | 20   | 6  | 14 |
| F0 variability        | De Keyser et al. (2016)    | Dutch      | 7                   | 70    | 14   | 4  | 10 |
| F0 variability        | Galaz et al. (2016)        | Czech      | 7.61                | 68.48 | 39   | 39 | 0  |
| F0 variability        | Galaz et al. (2016)        | Czech      | 7.83                | 66.21 | 59   | 0  | 59 |
| F0 variability        | Goberman & Elmer (2005)*   | English    | —                   | —     | 11   | —  | —  |
| F0 variability        | Goberman & Elmer (2005)    | English    | —                   | 73    | 12   | 6  | 6  |
| F0 variability        | Goberman et al. (2005)     | English    | 11.4                | 69.1  | 9    | 3  | 6  |
| F0 variability        | Harel et al. (2004)        | English    | —                   | —**   | 4    | 2  | 2  |
| F0 variability        | Huh et al. (2015)          | Korean     | 1.8                 | 64.1  | 14   | 14 | 0  |
| F0 variability        | Huh et al. (2015)          | Korean     | 2.4                 | 65.9  | 15   | 0  | 15 |
| F0 variability        | Jeancolas et al. (2022)    | French     | —                   | —     | 38   | 38 | 0  |
| F0 variability        | Jeancolas et al. (2022)    | French     | —                   | —     | 63   | 0  | 63 |
| F0 variability        | Jeancolas et al. (2022)    | French     | —                   | —     | 41   | 41 | 0  |
| F0 variability        | Jeancolas et al. (2022)    | French     | —                   | —     | 74   | 0  | 74 |
| F0 variability        | Lirani-Silva et al. (2015) | Portuguese | 5.5                 | 68    | 13   | 7  | 6  |
| F0 variability        | Lowit & Kuschmann (2012)   | English    | —                   | 62.6  | 8    | 3  | 5  |
| F0 variability        | Rektorova et al. (2007)    | Czech      | 3.4                 | 66    | 9    | 9  | 0  |
| F0 variability        | Rusz et al. (2011)         | Czech      | 2.52                | 61.74 | 23   | 4  | 19 |
| F0 variability        | Rusz et al. (2017)         | Czech      | 9.3                 | 64.4  | 22   | 12 | 10 |
| F0 variability        | Rusz et al. (2022)         | Czech      | 1.9                 | 61.2  | 40   | 40 | 0  |
| F0 variability        | Rusz et al. (2022)         | Czech      | 1.9                 | 60.8  | 60   | 0  | 60 |
| F0 variability        | Skodda et al. (2011)       | German     | —                   | 67.32 | 72   | 72 | 0  |
| F0 variability        | Skodda et al. (2011)       | German     | —                   | 67.04 | 97   | 0  | 97 |
| F0 variability        | Skrabal et al. (2020)      | Czech      | 8.8                 | 64.5  | 17   | 10 | 7  |
| F0 variability        | Thies et al. (2020)        | German     | 5.9                 | 66.2  | 19   | 6  | 13 |
| F0 variability        | Tjaden & Wilding (2011a)   | English    | 6.8                 | 54.2  | 5    | 5  | 0  |
| F0 variability        | Tjaden & Wilding (2011a)   | English    | 8.33                | 67.17 | 6    | 0  | 6  |
| F0 variability        | Tykalova et al. (2020)     | Italian    | 5.8                 | 63.4  | 21   | 8  | 13 |
| F0 variability        | Tykalova et al. (2020)     | Italian    | 4.7                 | 65.5  | 21   | 7  | 14 |
| F0 variability        | Verkhodanova et al. (2022) | Dutch      | 10.7                | 65.6  | 30   | 9  | 21 |
| Intensity variability | da Silva et al. (2021)     | Portuguese | —                   | —     | 10   | 10 | 0  |
| Intensity variability | da Silva et al. (2021)     | Portuguese | —                   | —     | 10   | 0  | 10 |
| Intensity variability | De Keyser et al. (2016)    | Dutch      | 7                   | 70    | 14   | 4  | 10 |
| Intensity variability | Galaz et al. (2016)        | Czech      | 7.8                 | 67.52 | 98   | 39 | 59 |
| Intensity variability | Jeancolas et al. (2022)    | French     | —                   | —     | 41   | 41 | 0  |
| Intensity variability | Jeancolas et al. (2022)    | French     | —                   | —     | 74   | 0  | 74 |
| Intensity variability | Lam & Tjaden (2016)        | English    | —                   | 68.3  | 14   | 5  | 9  |
| Intensity variability | Lirani-Silva et al. (2015) | Portuguese | 5.5                 | 68    | 13   | 7  | 6  |
| Intensity variability | Rektorova et al. (2007)    | Czech      | 3.4                 | 66    | 9    | 9  | 0  |
| Intensity variability | Rusz et al. (2011)         | Czech      | 2.52                | 61.74 | 23   | 4  | 19 |
| Intensity variability | Rusz et al. (2017)         | Czech      | 9.3                 | 64.4  | 22   | 12 | 10 |
| Intensity variability | Rusz et al. (2022)         | Czech      | 1.9                 | 61.2  | 40   | 40 | 0  |
| Intensity variability | Rusz et al. (2022)         | Czech      | 1.9                 | 60.8  | 60   | 0  | 60 |
| Intensity variability | Skrabal et al. (2020)      | Czech      | 8.8                 | 64.5  | 17   | 10 | 7  |
| Intensity variability | Tykalova et al. (2020)     | Italian    | 5.8                 | 65.5  | 21   | 7  | 14 |
| Intensity variability | Tykalova et al. (2020)     | Italian    | 4.7                 | 65.5  | 21   | 7  | 14 |
| Speech rate           | Goberman et al. (2005)     | English    | 11.4                | 69.1  | 9    | 3  | 6  |
| Speech rate           | Huh et al. (2015)          | Korean     | 1.8                 | 64.1  | 14   | 14 | 0  |

|                   |                               |            |      |       |    |    |    |
|-------------------|-------------------------------|------------|------|-------|----|----|----|
| Speech rate       | Huh et al. (2015)             | Korean     | 2.4  | 65.9  | 15 | 0  | 15 |
| Speech rate       | Lirani-Silva et al. (2015)    | Portuguese | 5.5  | 68    | 13 | 7  | 6  |
| Speech rate       | Lowit & Kuschmann (2012)      | English    | —    | 62.6  | 8  | 3  | 5  |
| Speech rate       | Skodda et al. (2011)          | German     | —    | 67.32 | 72 | 72 | 0  |
| Speech rate       | Skodda et al. (2011)          | German     | —    | 67.04 | 97 | 0  | 97 |
| Speech rate       | Tjaden & Wilding (2005)       | English    | 7.3  | 63    | 12 | 6  | 6  |
| Speech rate       | Tjaden & Wilding (2011b)      | English    | 7.25 | 63    | 12 | 6  | 6  |
| Speech rate       | Verkhodanova et al. (2022)    | Dutch      | 10.7 | 65.6  | 30 | 9  | 21 |
| Speech rate       | Walsh & Smith (2012)          | English    | 6.4  | 73.4  | 16 | 5  | 11 |
| Speech rate       | Whitfield & Gravelin (2019)   | English    | 6.2  | 67    | 10 | 5  | 5  |
| Articulation rate | Bandini et al. (2015)         | Italian    | 8.3  | 72.2  | 20 | 6  | 14 |
| Articulation rate | Goberman & Elmer (2005)       | English    | —    | 73    | 12 | 6  | 6  |
| Articulation rate | Goberman & Elmer (2005)       | English    | —    | —     | 11 | —  | —  |
| Articulation rate | Goberman et al. (2005)        | English    | 11.4 | 69.1  | 9  | 3  | 6  |
| Articulation rate | Konstantopoulos et al. (2021) | Greek      | 7.69 | 73.72 | 20 | 4  | 16 |
| Articulation rate | Lam & Tjaden (2016)           | English    | —    | 68.3  | 14 | 5  | 9  |
| Articulation rate | Lowit et al. (2018)           | English    | 7.2  | 68.2  | 10 | 0  | 10 |
| Articulation rate | McRae et al. (2002)           | English    | 5.5  | 64.3  | 4  | 4  | 0  |
| Articulation rate | McRae et al. (2002)           | English    | 8.2  | 67.9  | 9  | 0  | 9  |
| Articulation rate | Rusz et al. (2011)            | Czech      | 2.52 | 61.74 | 23 | 4  | 19 |
| Articulation rate | Rusz et al. (2022)            | Czech      | 1.9  | 61.2  | 40 | 40 | 0  |
| Articulation rate | Rusz et al. (2022)            | Czech      | 1.9  | 60.8  | 60 | 0  | 60 |
| Articulation rate | Skodda et al. (2011)          | German     | —    | 67.32 | 72 | 72 | 0  |
| Articulation rate | Skodda et al. (2011)          | German     | —    | 67.04 | 97 | 0  | 97 |
| Articulation rate | Skrabal et al. (2020)         | Czech      | 8.8  | 64.5  | 17 | 10 | 7  |
| Articulation rate | Tjaden & Wilding (2004)       | English    | 7.25 | 63    | 12 | 6  | 6  |
| Articulation rate | Tjaden & Wilding (2011a)      | English    | 7.6  | 61    | 11 | 5  | 6  |
| Articulation rate | Verkhodanova et al. (2022)    | Dutch      | 10.7 | 65.6  | 30 | 9  | 21 |
| Pause duration    | Harel et al. (2004)           | English    | —    | —     | 4  | 2  | 2  |
| Pause duration    | Hlavnicka et al. (2017)       | Czech      | 1.6  | 64.9  | 30 | 9  | 21 |
| Pause duration    | Huh et al. (2015)             | Korean     | 1.8  | 64.1  | 14 | 14 | 0  |
| Pause duration    | Huh et al. (2015)             | Korean     | 2.4  | 65.9  | 15 | 0  | 15 |
| Pause duration    | Jeancolas et al. (2022)       | French     | —    | —     | 41 | 41 | 0  |
| Pause duration    | Jeancolas et al. (2022)       | French     | —    | —     | 74 | 0  | 74 |
| Pause duration    | Jeancolas et al. (2022)       | French     | —    | —     | 38 | 38 | 0  |
| Pause duration    | Jeancolas et al. (2022)       | French     | —    | —     | 63 | 0  | 63 |
| Pause duration    | Rusz et al. (2021)            | Czech      | 1.5  | 75.4  | 24 | 10 | 14 |
| Pause duration    | Rusz et al. (2021)            | Czech      | 2.6  | 45.1  | 24 | 9  | 15 |
| Pause duration    | Rusz et al. (2022)            | Czech      | 1.9  | 61.2  | 40 | 40 | 0  |
| Pause duration    | Rusz et al. (2022)            | Czech      | 1.9  | 60.8  | 60 | 0  | 60 |
| Pause duration    | Tjaden & Wilding (2011b)      | English    | 7.25 | 63    | 12 | 6  | 6  |
| Pause duration    | Tykalova et al. (2020)        | Italian    | 5.8  | 63.4  | 21 | 8  | 13 |
| Pause duration    | Tykalova et al. (2020)        | Italian    | 4.7  | 65.5  | 21 | 7  | 14 |
| Pause duration    | Whitfield & Gravelin (2019)   | English    | 6.2  | 67    | 10 | 5  | 5  |
| Pause ratio       | Goberman & Elmer (2005)       | English    | —    | —     | 11 | —  | —  |
| Pause ratio       | Goberman & Elmer (2005)       | English    | —    | 73    | 12 | 6  | 6  |
| Pause ratio       | Goberman et al. (2005)        | English    | 11.4 | 69.1  | 9  | 3  | 6  |
| Pause ratio       | Rusz et al. (2011)            | Czech      | 2.52 | 61.74 | 23 | 4  | 19 |
| Pause ratio       | Skodda et al. (2011)          | German     | —    | 67.32 | 72 | 72 | 0  |
| Pause ratio       | Skodda et al. (2011)          | German     | —    | 67.04 | 97 | 0  | 97 |
| Pause ratio       | Tjaden & Wilding (2011b)      | English    | 7.25 | 63    | 12 | 6  | 6  |
| F0                | Goberman et al. (2002)        | English    | 13.7 | 70    | 3  | 3  | 0  |
| F0                | Goberman et al. (2002)        | English    | 10.3 | 68.7  | 6  | 0  | 6  |

|           |                          |            |      |       |    |    |    |
|-----------|--------------------------|------------|------|-------|----|----|----|
| F0        | Lam & Tjaden (2016)      | English    | —    | 68.3  | 14 | 5  | 9  |
| F0        | Rektorova et al. (2007)  | Czech      | 3.4  | 66    | 9  | 9  | 0  |
| F0        | Skodda et al. (2011)     | German     | —    | 67.32 | 72 | 72 | 0  |
| F0        | Skodda et al. (2011)     | German     | —    | 67.04 | 97 | 0  | 97 |
| F0        | Tanaka et al. (2011)     | Japanese   | 3.91 | 69.5  | 24 | 24 | 0  |
| F0        | Tanaka et al. (2011)     | Japanese   | 3.72 | 72.5  | 15 | 0  | 15 |
| Intensity | da Silva et al. (2021)   | Portuguese | —    | —     | 10 | 10 | 0  |
| Intensity | da Silva et al. (2021)   | Portuguese | —    | —     | 10 | 0  | 10 |
| Intensity | Darling & Huber (2011)   | English    | 4.8  | 78    | 9  | 3  | 6  |
| Intensity | De Keyser et al. (2016)  | Dutch      | 7    | 70    | 14 | 4  | 10 |
| Intensity | Lam & Tjaden (2016)      | English    | —    | 68.3  | 14 | 5  | 9  |
| Intensity | Rektorova et al. (2007)  | Czech      | 3.4  | 66    | 9  | 9  | 0  |
| Intensity | Rusz et al. (2017)       | Czech      | 9.3  | 64.4  | 22 | 12 | 10 |
| Intensity | Skodda et al. (2010)     | German     | 2.41 | 63.9  | 23 | 14 | 9  |
| Intensity | Skrabal et al. (2020)    | Czech      | 8.8  | 64.5  | 17 | 10 | 7  |
| Intensity | Thies et al. (2020)      | German     | 5.9  | 66.2  | 19 | 6  | 13 |
| Intensity | Tjaden & Wilding (2004)  | English    | 7.25 | 63    | 12 | 6  | 6  |
| Intensity | Tjaden & Wilding (2005)  | English    | 7.3  | 63    | 12 | 6  | 6  |
| Intensity | Tjaden & Wilding (2011a) | English    | 7.6  | 61    | 11 | 5  | 6  |
| Intensity | Walsh & Smith (2012)     | English    | 6.4  | 73.4  | 16 | 5  | 11 |

*Note.* *n* PD = number of PD participants; F = number of female PD participants; M = number of male PD participants.

\*If an article reports data from multiple studies involving different participant groups, each study will have its own row in the table.

\*\*Between 55 and 75.
