# Supplementary material
Source: publisher figshare collection journal article supplement (https://asha.figshare.com/articles/dataset/_/25892923)
Supplement: Supplementary file 4 [file 2]

**Supplemental Material S3.** Effect size estimates per article.

| Acoustic feature      | Article                       | Estimated effect size | Position of 95% credible interval related to the null |
|-----------------------|-------------------------------|-----------------------|-------------------------------------------------------|
| F0 variability        | Bandini et al. (2015)         | -0.31 (-0.95, 0.31)   | Null                                                  |
| F0 variability        | De Keyser et al. (2016)       | -0.86 (-1.43, -0.31)  | Negative                                              |
| F0 variability        | Galaz et al. (2016)           | -0.47 (-0.69, -0.26)  | Negative                                              |
| F0 variability        | Goberman & Elmer (2005)       | -0.72 (-1.21, -0.19)  | Negative                                              |
| F0 variability        | Goberman et al. (2005)        | -0.76 (-1.17, -0.35)  | Negative                                              |
| F0 variability        | Harel et al. (2004)           | -0.91 (-1.68, -0.22)  | Negative                                              |
| F0 variability        | Huh et al. (2015)             | -0.6 (-0.93, -0.24)   | Negative                                              |
| F0 variability        | Jeancolas et al. (2022)       | -0.78 (-0.95, -0.6)   | Negative                                              |
| F0 variability        | Lirani-Silva et al. (2015)    | -0.63 (-1.21, -0.03)  | Negative                                              |
| F0 variability        | Lowit & Kuschmann (2012)      | -0.64 (-1.24, 0.01)   | Null                                                  |
| F0 variability        | Rektorova et al. (2007)       | -0.62 (-1.21, 0.04)   | Null                                                  |
| F0 variability        | Rusz et al. (2011)            | -1.18 (-1.54, -0.83)  | Negative                                              |
| F0 variability        | Rusz et al. (2017)            | -0.93 (-1.4, -0.46)   | Negative                                              |
| F0 variability        | Rusz et al. (2022)            | -1.2 (-1.5, -0.89)    | Negative                                              |
| F0 variability        | Skodda et al. (2011)          | -0.78 (-1.19, -0.36)  | Negative                                              |
| F0 variability        | Skrabal et al. (2020)         | -0.93 (-1.34, -0.51)  | Negative                                              |
| F0 variability        | Thies et al. (2020)           | -0.49 (-0.99, 0.02)   | Null                                                  |
| F0 variability        | Tjaden & Wilding (2011a)      | -0.89 (-1.47, -0.33)  | Negative                                              |
| F0 variability        | Tykalova et al. (2020)        | -1.14 (-1.57, -0.7)   | Negative                                              |
| F0 variability        | Verkhodanova et al. (2022)    | -0.56 (-0.89, -0.22)  | Negative                                              |
| Intensity variability | da Silva et al. (2021)        | -0.03 (-0.61, 0.56)   | Null                                                  |
| Intensity variability | De Keyser et al. (2016)       | -0.42 (-1.09, 0.27)   | Null                                                  |
| Intensity variability | Galaz et al. (2016)           | 0.14 (-0.06, 0.34)    | Null                                                  |
| Intensity variability | Jeancolas et al. (2022)       | -0.14 (-0.42, 0.14)   | Null                                                  |
| Intensity variability | Lam & Tjaden (2016)           | -0.83 (-1.52, -0.14)  | Negative                                              |
| Intensity variability | Lirani-Silva et al. (2015)    | 0.36 (-0.37, 1.08)    | Null                                                  |
| Intensity variability | Rektorova et al. (2007)       | -0.57 (-1.33, 0.15)   | Null                                                  |
| Intensity variability | Rusz et al. (2011)            | -0.99 (-1.31, -0.66)  | Negative                                              |
| Intensity variability | Rusz et al. (2017)            | 0.07 (-0.5, 0.65)     | Null                                                  |
| Intensity variability | Rusz et al. (2022)            | -0.77 (-1.05, -0.49)  | Negative                                              |
| Intensity variability | Skrabal et al. (2020)         | -0.26 (-0.69, 0.18)   | Null                                                  |
| Intensity variability | Tykalova et al. (2020)        | -0.31 (-0.72, 0.1)    | Null                                                  |
| Speech rate           | Goberman et al. (2005)        | -0.78 (-1.24, -0.38)  | Negative                                              |
| Speech rate           | Huh et al. (2015)             | -0.13 (-0.47, 0.22)   | Null                                                  |
| Speech rate           | Lirani-Silva et al. (2015)    | -0.04 (-0.79, 0.73)   | Null                                                  |
| Speech rate           | Lowit & Kuschmann (2012)      | -0.55 (-1.07, 0.08)   | Null                                                  |
| Speech rate           | Skodda et al. (2011)          | 0.16 (-0.15, 0.47)    | Null                                                  |
| Speech rate           | Tjaden & Wilding (2005)       | -0.45 (-0.95, 0.17)   | Null                                                  |
| Speech rate           | Tjaden & Wilding (2011b)      | -0.63 (-1.16, -0.09)  | Negative                                              |
| Speech rate           | Verkhodanova et al. (2022)    | -1.12 (-1.48, -0.74)  | Negative                                              |
| Speech rate           | Walsh & Smith (2012)          | -0.57 (-1.05, -0.06)  | Negative                                              |
| Speech rate           | Whitfield & Gravelin (2019)   | -0.55 (-1.07, 0.07)   | Null                                                  |
| Articulation rate     | Bandini et al. (2015)         | 0.64 (-0.12, 1.32)    | Null                                                  |
| Articulation rate     | Goberman & Elmer (2005)       | -0.24 (-0.8, 0.24)    | Null                                                  |
| Articulation rate     | Goberman et al. (2005)        | -0.28 (-0.74, 0.12)   | Null                                                  |
| Articulation rate     | Konstantopoulos et al. (2021) | -1.39 (-2.08, -0.53)  | Negative                                              |
| Articulation rate     | Lam & Tjaden (2016)           | 0.28 (-0.36, 1.07)    | Null                                                  |
| Articulation rate     | Lowit et al. (2018)           | -0.23 (-0.82, 0.3)    | Null                                                  |

|                   |                             |                      |          |
|-------------------|-----------------------------|----------------------|----------|
| Articulation rate | McRae et al. (2002)         | 0.24 (-0.38, 0.99)   | Null     |
| Articulation rate | Rusz et al. (2011)          | -0.03 (-0.54, 0.49)  | Null     |
| Articulation rate | Rusz et al. (2022)          | -0.21 (-0.5, 0.07)   | Null     |
| Articulation rate | Skodda et al. (2011)        | 0.03 (-0.27, 0.32)   | Null     |
| Articulation rate | Skrabal et al. (2020)       | 0.13 (-0.32, 0.65)   | Null     |
| Articulation rate | Tjaden & Wilding (2004)     | -0.22 (-0.83, 0.35)  | Null     |
| Articulation rate | Tjaden & Wilding (2011a)    | -0.19 (-0.81, 0.39)  | Null     |
| Articulation rate | Verkhodanova et al. (2022)  | -0.71 (-1.09, -0.31) | Negative |
| Pause duration    | Harel et al. (2004)         | 0.74 (0.03, 1.54)    | Positive |
| Pause duration    | Hlavnicka et al. (2017)     | 0.73 (0.4, 1.06)     | Positive |
| Pause duration    | Huh et al. (2015)           | 0.16 (-0.19, 0.48)   | Null     |
| Pause duration    | Jeancolas et al. (2022)     | 0.48 (0.27, 0.71)    | Positive |
| Pause duration    | Rusz et al. (2021)          | 0.46 (0.12, 0.8)     | Positive |
| Pause duration    | Rusz et al. (2022)          | 0.26 (-0.04, 0.55)   | Null     |
| Pause duration    | Tjaden & Wilding (2011b)    | 0.73 (0.19, 1.33)    | Positive |
| Pause duration    | Tykalova et al. (2020)      | 0.45 (0.03, 0.86)    | Positive |
| Pause duration    | Whitfield & Gravelin (2019) | 0.78 (0.31, 1.31)    | Positive |
| Pause ratio       | Goberman & Elmer (2005)     | 0.32 (-0.5, 1.07)    | Null     |
| Pause ratio       | Goberman et al. (2005)      | 0.95 (0.49, 1.43)    | Positive |
| Pause ratio       | Rusz et al. (2011)          | 0.41 (0, 0.82)       | Null     |
| Pause ratio       | Skodda et al. (2011)        | -0.38 (-0.83, 0.08)  | Null     |
| Pause ratio       | Tjaden & Wilding (2011b)    | 1 (0.28, 1.74)       | Positive |
| F0                | Goberman et al. (2002)      | 0.44 (0.04, 0.87)    | Positive |
| F0                | Lam & Tjaden (2016)         | 0.29 (-0.3, 0.8)     | Null     |
| F0                | Rektorova et al. (2007)     | 0.11 (-0.71, 0.79)   | Null     |
| F0                | Skodda et al. (2011)        | 0.25 (-0.07, 0.57)   | Null     |
| F0                | Tanaka et al. (2011)        | 0.33 (-0.07, 0.78)   | Null     |
| Intensity         | da Silva et al. (2021)      | -0.3 (-0.84, 0.25)   | Null     |
| Intensity         | Darling & Huber (2011)      | -0.72 (-1.47, -0.04) | Negative |
| Intensity         | De Keyser et al. (2016)     | -0.55 (-0.98, -0.15) | Negative |
| Intensity         | Lam & Tjaden (2016)         | -0.34 (-0.94, 0.28)  | Null     |
| Intensity         | Rektorova et al. (2007)     | -0.44 (-1.22, 0.3)   | Null     |
| Intensity         | Rusz et al. (2017)          | -0.03 (-0.59, 0.5)   | Null     |
| Intensity         | Skodda et al. (2010)        | -0.53 (-1.09, 0.05)  | Null     |
| Intensity         | Skrabal et al. (2020)       | 0.33 (-0.14, 0.8)    | Null     |
| Intensity         | Thies et al. (2020)         | 0.19 (-0.26, 0.63)   | Null     |
| Intensity         | Tjaden & Wilding (2004)     | -0.45 (-1.07, 0.18)  | Null     |
| Intensity         | Tjaden & Wilding (2005)     | -0.25 (-0.87, 0.39)  | Null     |
| Intensity         | Tjaden & Wilding (2011a)    | -0.35 (-0.99, 0.29)  | Null     |
| Intensity         | Walsh & Smith (2012)        | -1.02 (-1.75, -0.29) | Negative |
