# Supplementary material
Source: publisher figshare collection journal article supplement (https://asha.figshare.com/articles/dataset/_/25892923)

**Supplemental Material S4.** Funnel plots.

**Figure 4.1.** Funnel plot for F0 variability.

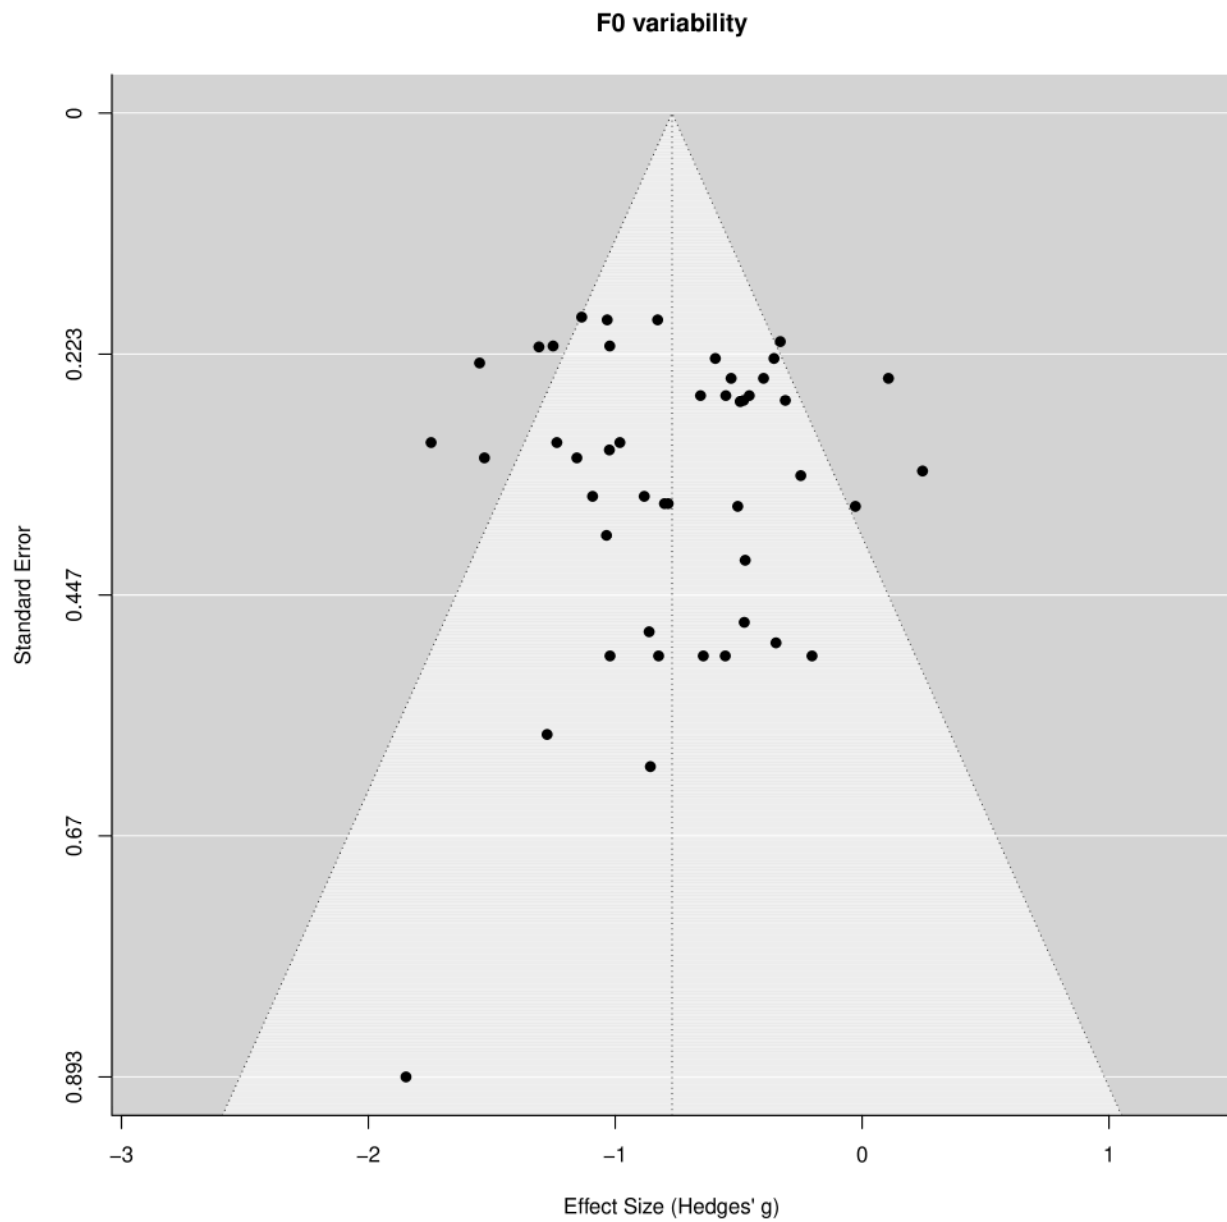

**Figure 4.2.** Funnel plot for intensity variability.

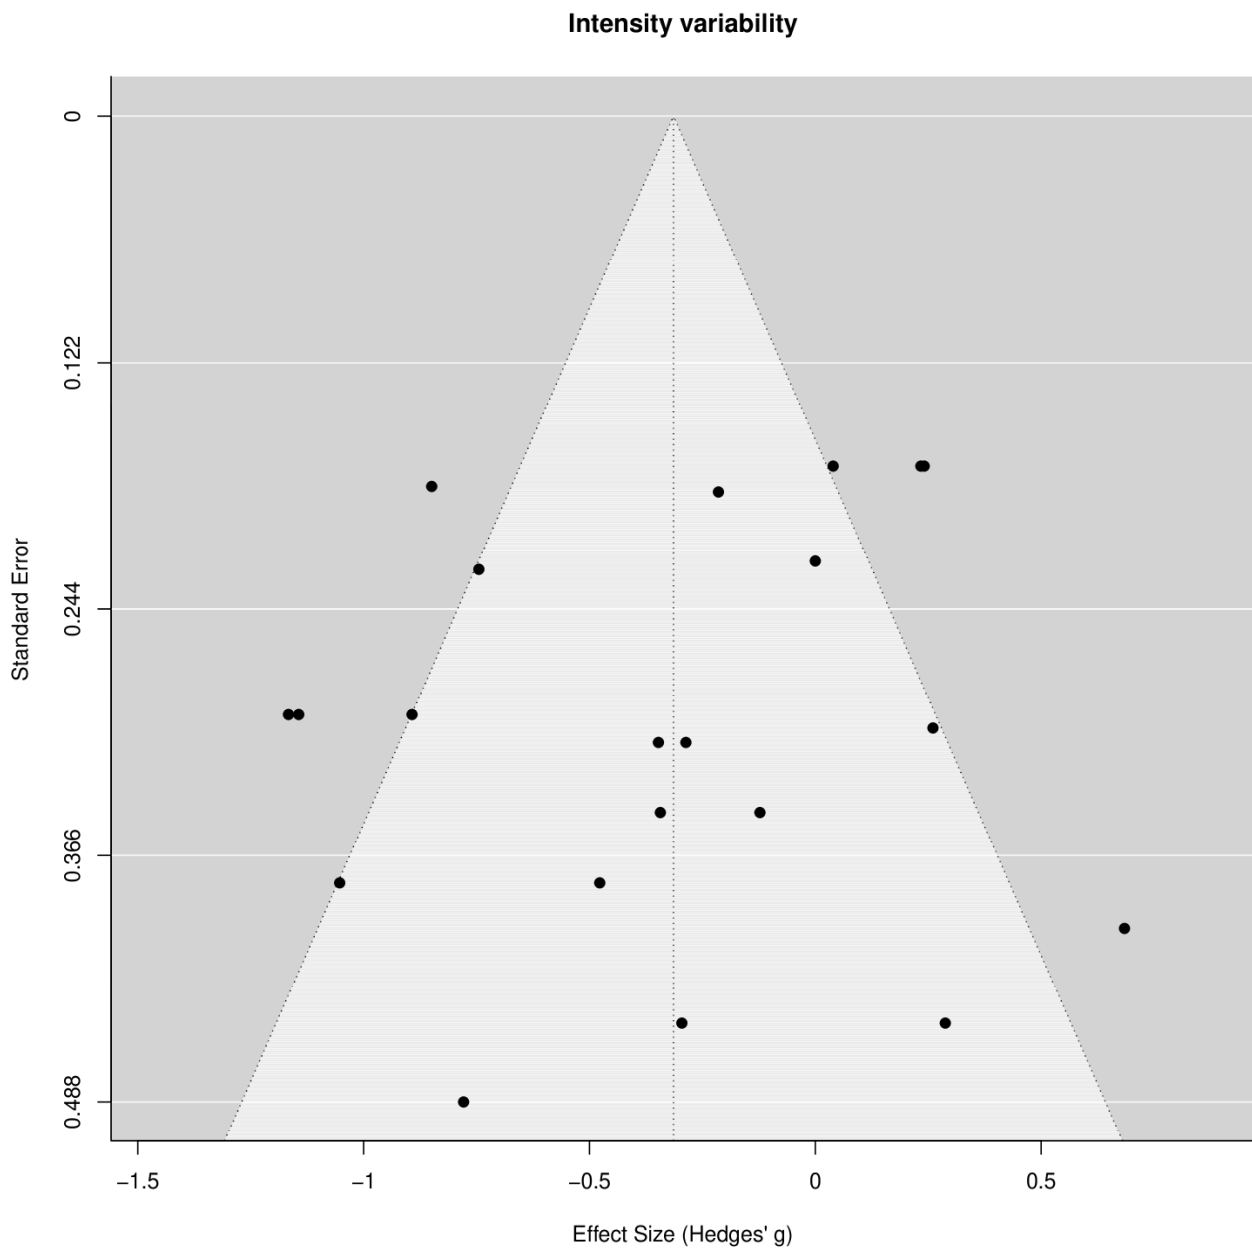

**Figure 4.3.** Funnel plot for speech rate.

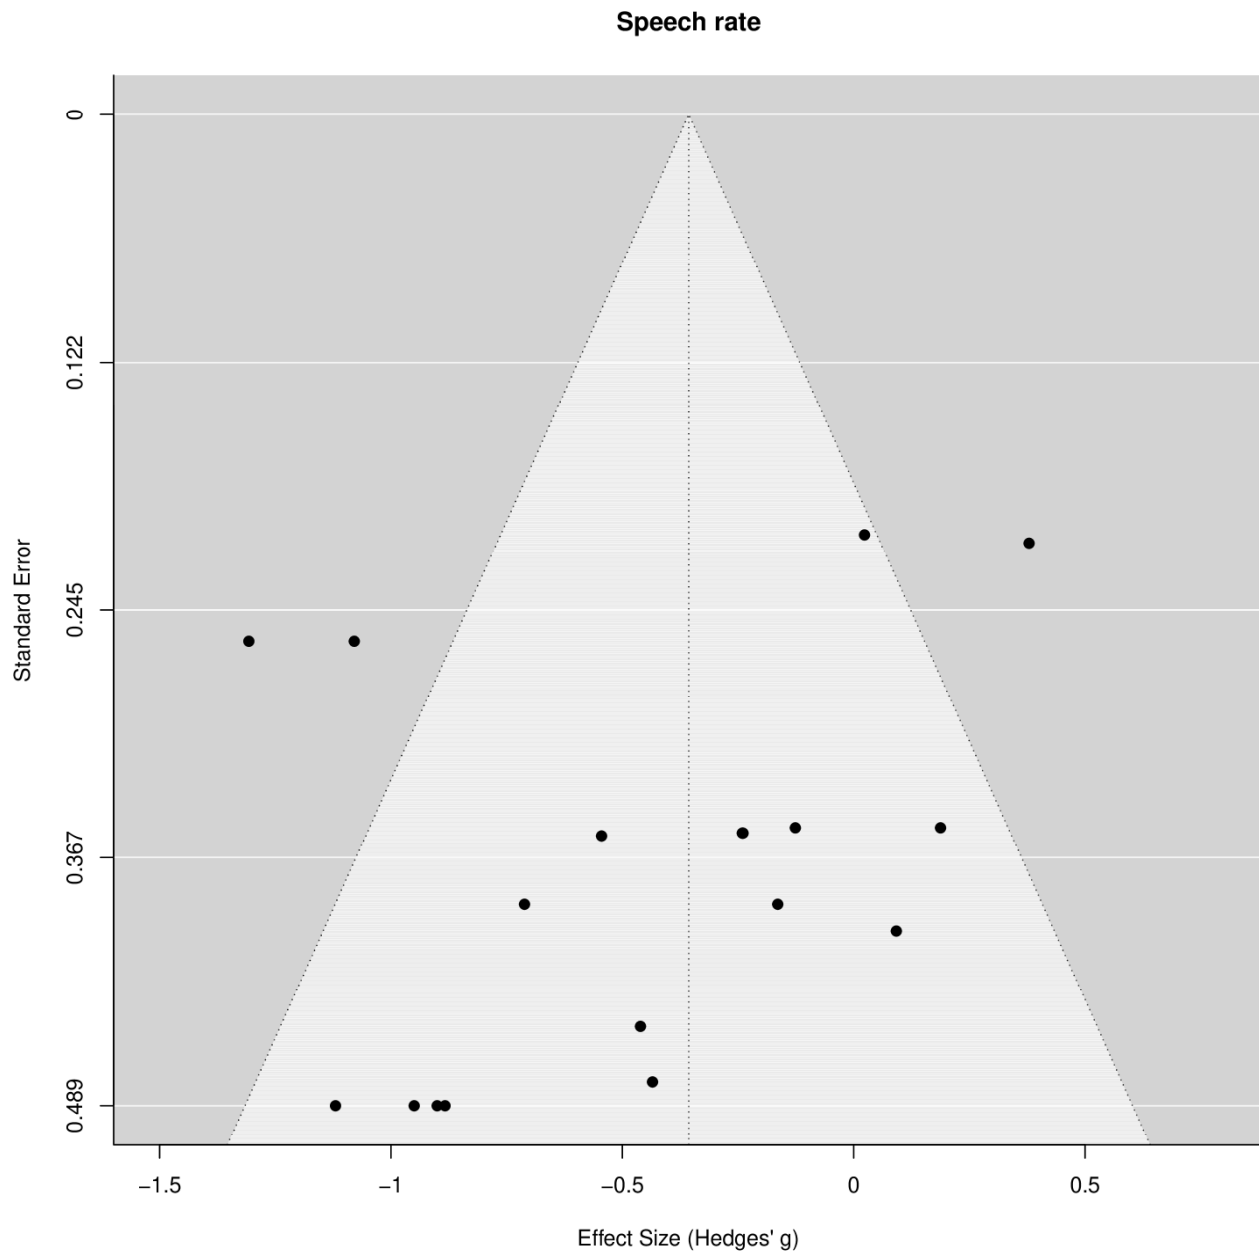

**Figure 4.4.** Funnel plot for articulation rate.

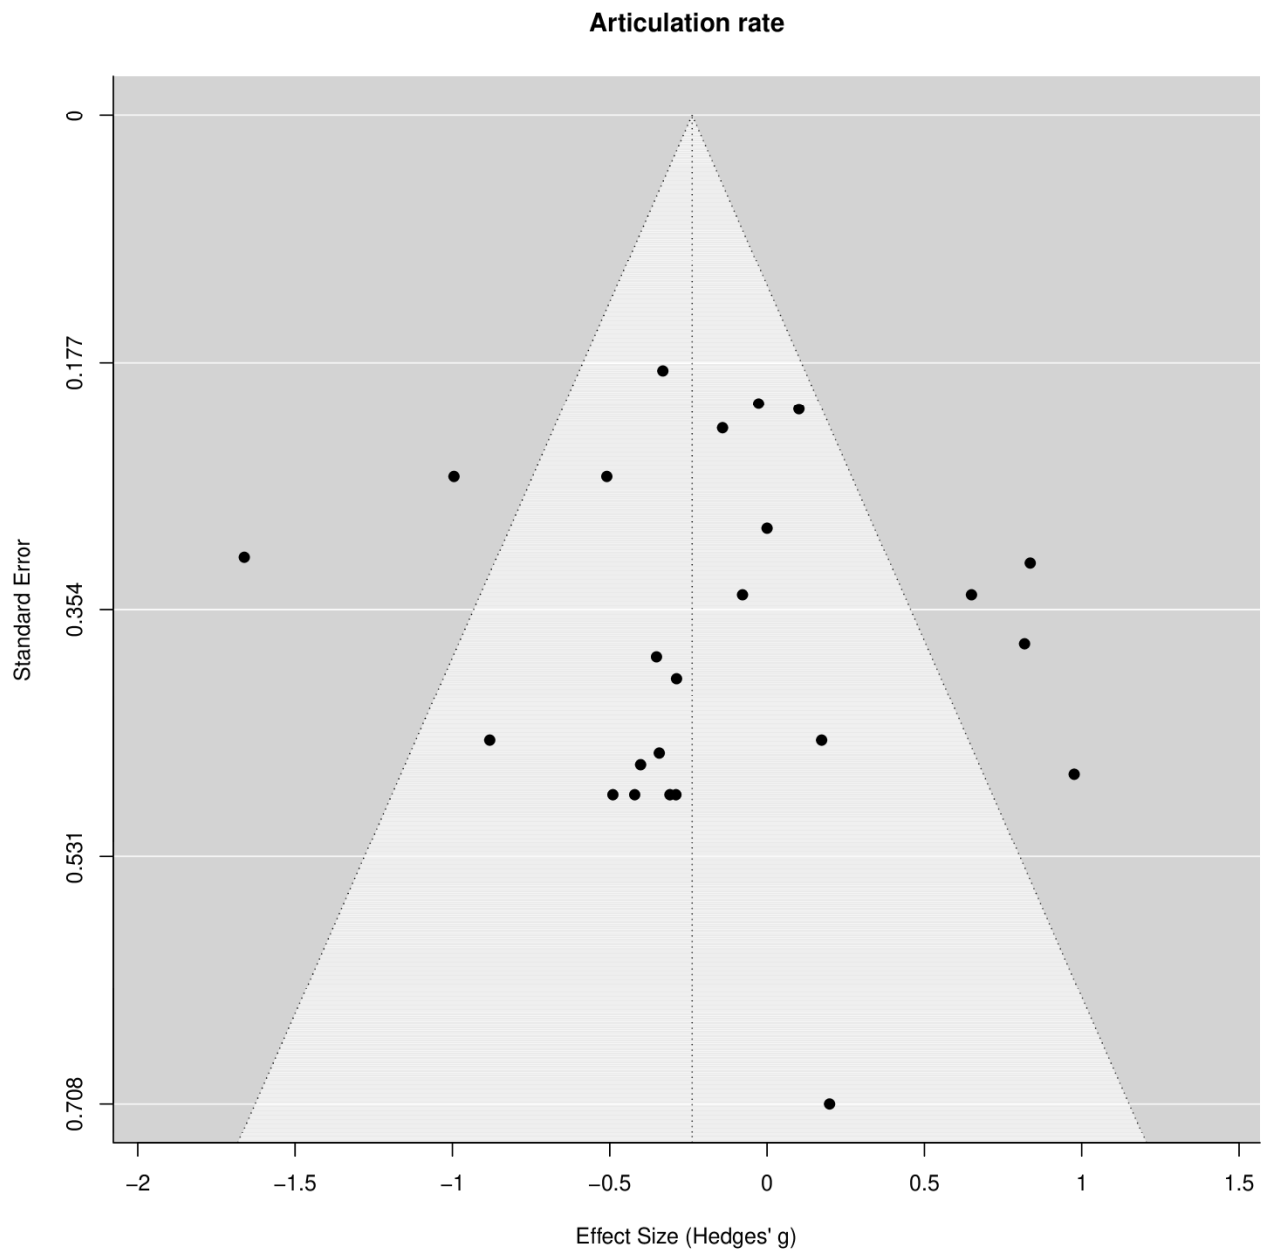

**Figure 4.5.** Funnel plot for pause duration.

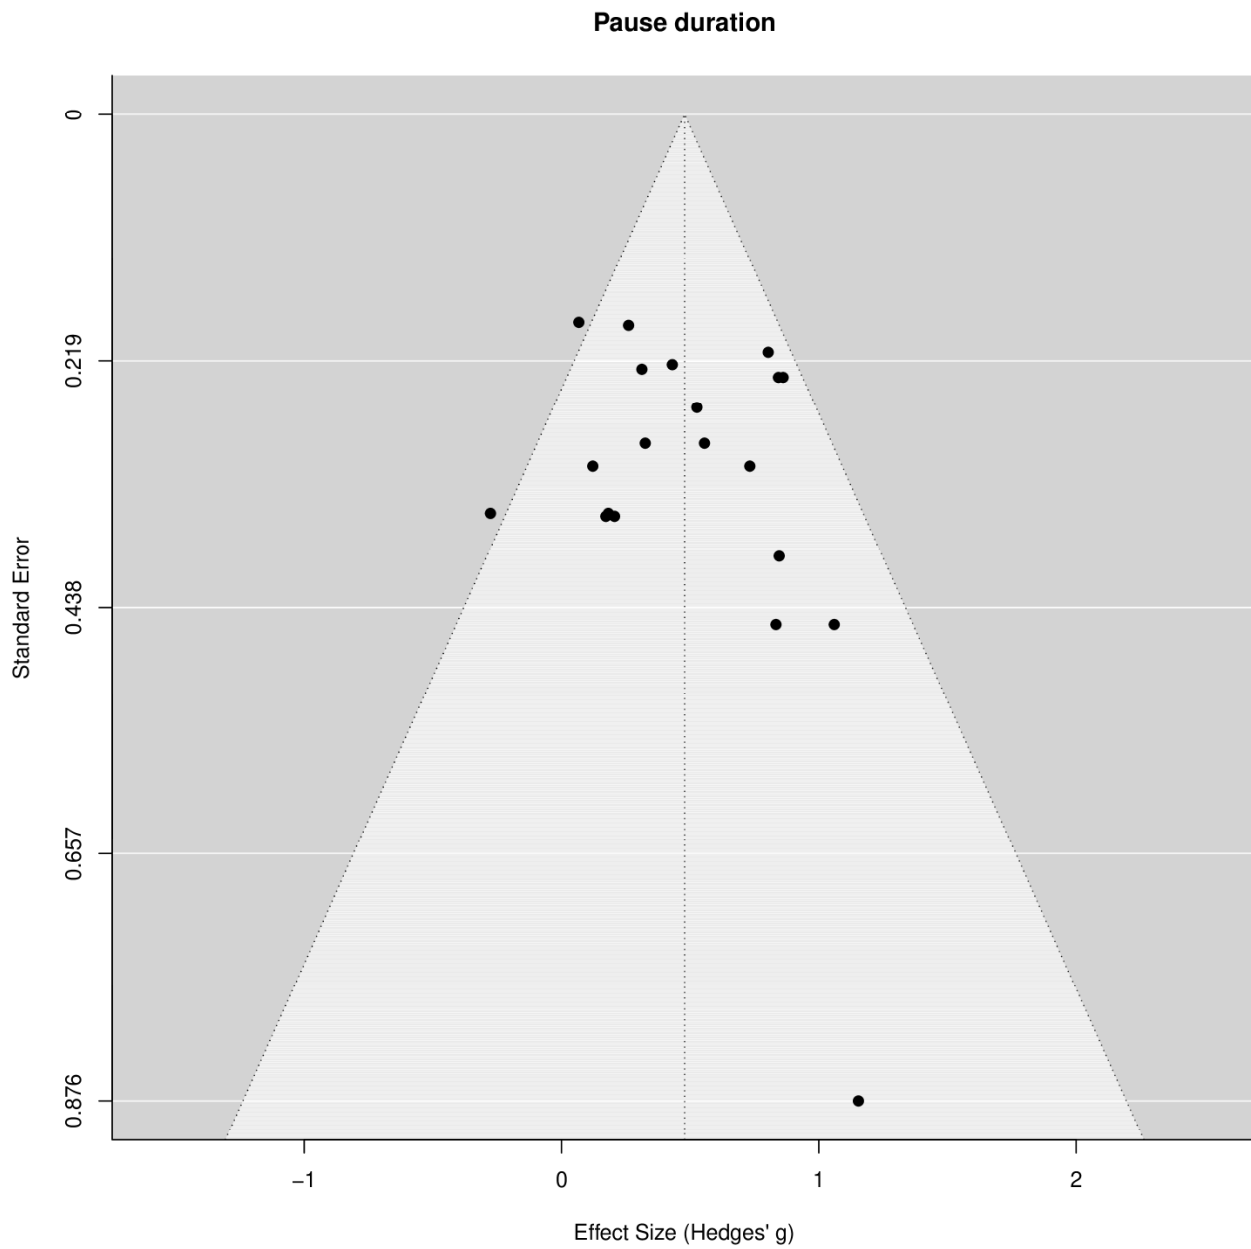

**Figure 4.6.** Funnel plot for pause ratio.

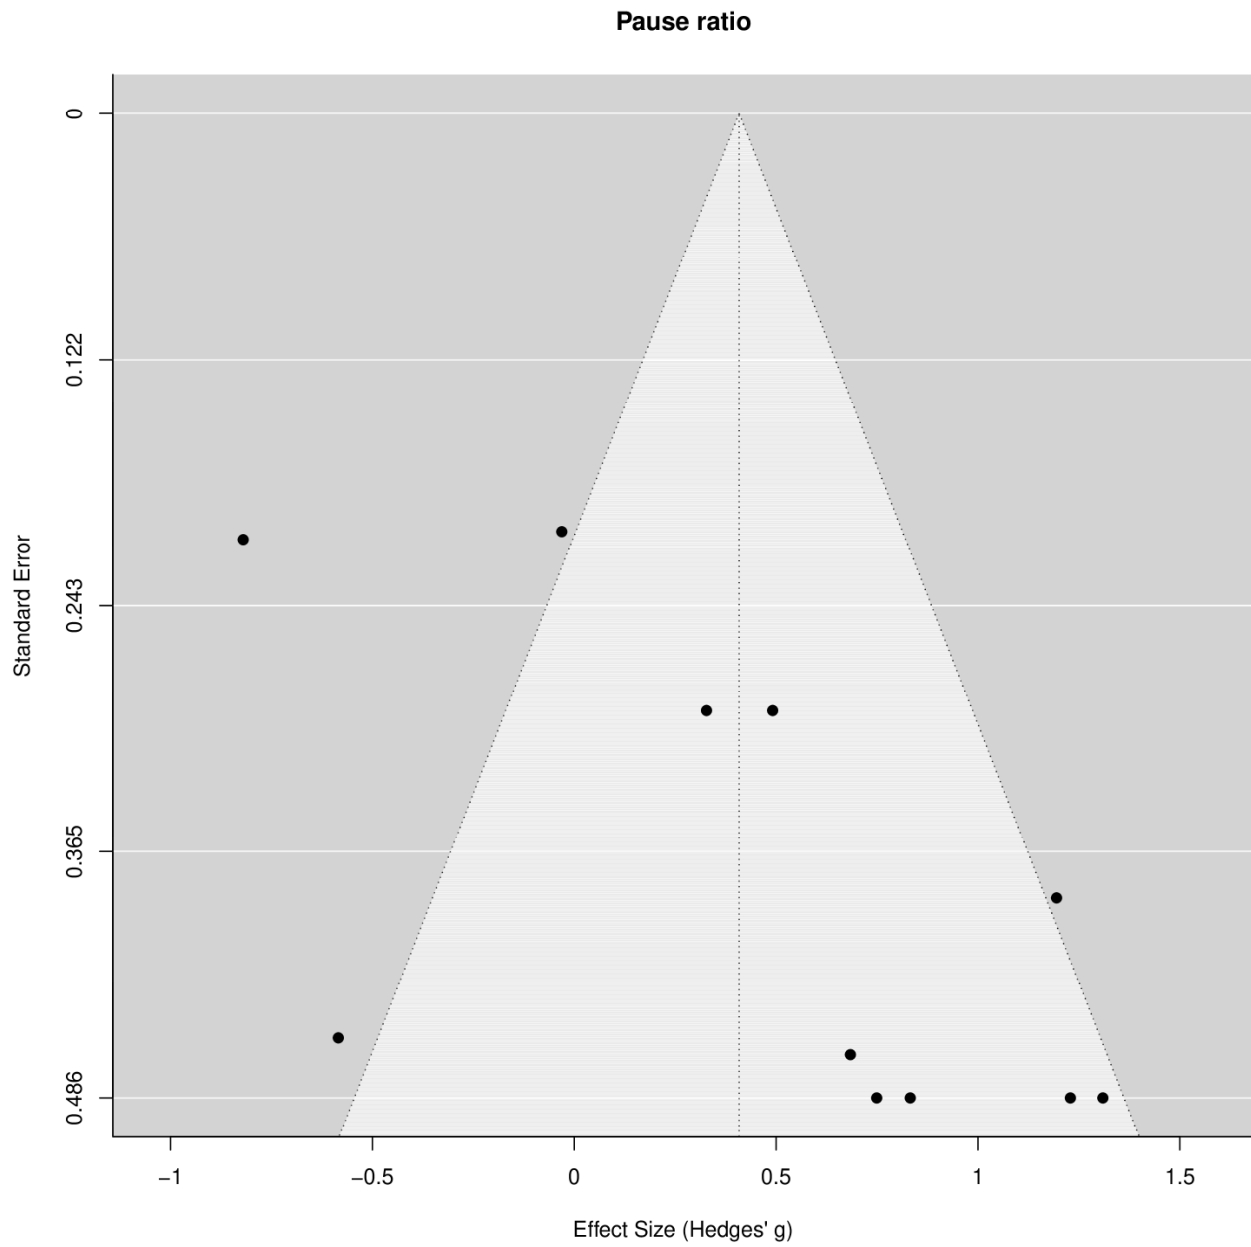

Supplement: Supplementary file 5 [file 2]
